# Supplementary material for: Interplay between copper and zinc homeostasis through the transcriptional regulator Zur in Enterococcus faecalis
Source: Royal Society of Chemistry journal article supplement (doi:10.1039/c5mt00043b), 2015-04-09
Supplement: c5mt00043b1.pdf [file c5mt00043b1.pdf]

## Supplementary legends

**Supplementary Figure 1.** Sequence alignments among *E. faecalis* members and archetypes involved in Zn homeostasis in different bacterial species (Id code Supplementary Table 1). Asterisks indicate conserved residues involved in Zn binding, black: identical residues, grey: similar residues.

**Supplementary Figure 2.** Effect of Zn, TPEN and Cu supplementation on *E. faecalis* growth. Cellular growth curves at increasing concentration of ZnCl<sub>2</sub> (A), TPEN (B) and CuSO<sub>4</sub> (C). Error bars = standard deviation (SD) values. Asterisks = significant differences. (Mann-Whitney test, p<0.05).

**Supplementary Figure 3.** Relative mRNA abundance of *fieF* exposed to Zn, TPEN and Cu in **A.** WT and **B.**  $\Delta$ *zur* strains. Light grey bars indicate the fold change (log<sub>2</sub>) in transcript abundance between WT and  $\Delta$ *zur* strains growing in the control media. Black, white and dark grey bars indicate fold changes in transcript abundance between  $\Delta$ *zur* strain exposed to 0.5 mM ZnCl<sub>2</sub>, 5  $\mu$ M TPEN or 0.5 mM CuSO<sub>4</sub> and the  $\Delta$ *zur* growing in control media (REST test, p<0.05).

**Supplementary Figure 4.** Effect of Zn and Cu supplementation on WT and  $\Delta$ *zur* growth. Cellular growth curves at increasing concentration of ZnCl<sub>2</sub> (A) or CuSO<sub>4</sub> (B). Error bars = standard deviation (SD) values. Asterisks = significant differences. (Mann-Whitney test, p<0.05).

**Supplementary Table 1.** Proteins involved in bacterial zinc homeostasis

**Supplementary Table 2.** Predicted transcriptional regulatory network activated by zinc in *E. faecalis*.

**Supplementary Table 3.** Gene-specific primers used in qPCR and  $\Delta$ *zur* mutant construction.
