# Supplementary material for: Interplay between copper and zinc homeostasis through the transcriptional regulator Zur in Enterococcus faecalis
Source: Royal Society of Chemistry journal article supplement (doi:10.1039/c5mt00043b), 2015-04-09
Supplement: c5mt00043b2.pdf [file c5mt00043b2.pdf]

**A.**

OD<sub>600nm</sub>

Time (h)

**B.**

OD<sub>600nm</sub>

Time (h)

**C.**

OD<sub>600nm</sub>

Time (h)

**A.**

*fief* (EF0859)

**B.**

*fief* (EF0859)

Fold change (Log2)

**A.**

WT  $\Delta zur$   
Control  
Zn 0.5 mM  
Zn 3 mM

OD<sub>600nm</sub>

Time (h)

**B.**

WT  $\Delta zur$   
Control  
Cu 0.5 mM  
Cu 1 mM

OD<sub>600nm</sub>

Time (h)
