# Supplementary material for: Interplay between copper and zinc homeostasis through the transcriptional regulator Zur in Enterococcus faecalis
Source: Royal Society of Chemistry journal article supplement (doi:10.1039/c5mt00043b), 2015-04-09
Supplement: c5mt00043b3.xlsx [file c5mt00043b3.xlsx]

## Sheet: S1
Supplementary table 1
Proteins involved in bacterial zinc homeostasis
Gene name	Bacteria	NCBI code	Anotation	Transcriptional regulator	References
AdcA	Bacillus subtilis	NP_388167.1	Zn(II)-binding lipoprotein	AdcR	Reyes-Caballero 2010
AdcB	Bacillus subtilis	NP_388169.1	high affinity Zn(II) ABC transporter permease	AdcR	Reyes-Caballero 2010
AdcC	Bacillus subtilis	NP_388168.1	Zn(II) transporter ATP-binding protein	AdcR	Reyes-Caballero 2010
AdcR	Streptococcus pneumoniae	YP_817386.1	transcriptional regulator of the adc operon	AdcR	Reyes-Caballero 2010
CPE2303	Clostridium perfringens	NP_563219.1	heavy metal-transporting ATPase		Brocklehurst 1999, Beard 1997
CzcD	Bacillus subtilis	NP_390542.1	potassium/proton-divalent cation antiporter		Montanini 2007
FieF	Escherichia coli	NP_418350.1	ferrous iron and zinc transporter		Montanini 2007
ykgM	Escherichia coli	NP_414830.1	rpmE (L31) paralog.Survive During Zinc Starvation.	Zur	Panina 2003
yodA	Escherichia coli	YP_853022.1	conserved metal-binding protein	Zur	Hantke 2001, Panina 2002, Kershaw 2007
ZinT	Escherichia coli	NP_416482.1	zinc and cadmium binding protein, periplasmic	Zur	Hantke 2001, Panina 2002, Kershaw 2007
ZitR	Lactococcus lactis	YP_001033643.1	transcriptional regulator of the zit operon		Llull 2011, Llull 2004
ZntA	Escherichia coli	YP_003080226.1	zinc/cadmium/mercury/lead-transporting ATPase-eflujo	ZntR	Brocklehurst 1999, Beard 1997
ZntA2	Thermoanaerobacter tengcongensis	NP_623993.1	cation transport ATPase	ZntR	Brocklehurst 1999, Beard 1997
ZntR	Escherichia coli	YP_003236437.1	encoding a Zn(II)-responsive transcriptional regulator that regulates zntA	ZntR	Brocklehurst 1999
ZnuA	Escherichia coli	YP_003078318.1	high-affinity zinc transporter periplasmic component	Zur	Dalet 1999, Patzer 1998, Hantke 2001, Patzer 1998
ZnuB	Escherichia coli	ABJ01210.1	ZnuB, subunit of ZnuA/ZnuB/ZnuC ABC transporter	Zur	Patzer 1998
ZnuC	Escherichia coli	BAA15666.1	zinc transporter subunit	Zur	Patzer 1998
ZosA	Bacillus subtilis	NP_389268.1	P-type ATPase for zinc incorporation	Per	Gaballa 2002, Ogura 2011
Zur	Staphylococcus aureus	YP_041027.1	zinc-specific metalloregulatory protein		Hantke 2001, Outten 2001
