# Supplementary material for: Interplay between copper and zinc homeostasis through the transcriptional regulator Zur in Enterococcus faecalis
Source: Royal Society of Chemistry journal article supplement (doi:10.1039/c5mt00043b), 2015-04-09
Supplement: c5mt00043b4.xlsx [file c5mt00043b4.xlsx]

## Sheet: S2
Supplementary Table 2
Predicted transcriptional regulatory network activated by zinc in E. faecalis.
GENE ID*	COG Annotation	Gene Name	EC Number	Operon ID	First Gene Operon	Genes per Operon	Start Operon	COG Operon	TF	BS	BS Position	WT Cu 05 mM	WT Zn 4 mM
EF0055	[P] adhesion lipoprotein	adcA		EF0055-EF0057	EF0055	3	55754	2	Zur	taaaccgtaatatttacgatttg	55643	down	down
EF0056	[P] ABC transporter, ATP-binding protein	adcB		EF0055-EF0057	EF0055	3	55754	2	Zur	taaaccgtaatatttacgatttg	55643	down	down
EF0057	[P] ABC transporter, permease protein	adcC		EF0055-EF0057	EF0055	3	55754	2	Zur	taaaccgtaatatttacgatttg	55643	down	down
EF2417	[P] transcriptional regulator, Fur family	zur		EF2417	EF2417	1	2336935	2	Zur	tatttcgtaatgattctgattta	2336990	down	down
EF3206	[P] adhesion lipoprotein	adcA-II		EF3206	EF3206	1	3075467	2	Zur	taaatcgtaatggttacgatttg	3075412	down	down
EF0149	NoCOG			EF0149	EF0149	1	146450	5	MalI	aaaacgtttt	146473		down
EF0076	[IQR] oxidoreductase, short chain dehydrogenase/reductase family			EF0076-EF0079	EF0076	4	76736	5	LysR	atgagtattaaaaatattttttta	76641		up
EF0077	NoCOG			EF0076-EF0079	EF0076	4	76736	5	LysR	atgagtattaaaaatattttttta	76641		up
EF0078	NoCOG			EF0076-EF0079	EF0076	4	76736	5	LysR	atgagtattaaaaatattttttta	76641		up
EF0079	NoCOG			EF0076-EF0079	EF0076	4	76736	5	LysR	atgagtattaaaaatattttttta	76641		up
EF0112	[K] hypothetical protein			EF0112-EF0113	EF0112	2	115686	1	LysR	aaatatataaattaaaaatatatt	115644		down
EF0113	[K] hypothetical protein			EF0112-EF0113	EF0112	2	115686	1	LysR	aaatatataaattaaaaatatatt	115644		down
EF0907	[E] peptide ABC transporter, peptide-binding protein			EF0907	EF0907	1	873037	3	LysR	aaataattattaa	872974		down
EF0907	[E] peptide ABC transporter, peptide-binding protein			EF0907	EF0907	1	873037	3	LysR	aaaaattaaaaaaagttaacattt	872902		down
EF1300	NoCOG			EF1300-EF1301	EF1300	2	1263875	5	LysR	aaaaattatataaatggctttttt	1263704	up	up
EF1301	NoCOG			EF1300-EF1301	EF1300	2	1263875	5	LysR	aaaaattatataaatggctttttt	1263704	up	up
EF1353	[C] pyruvate dehydrogenase complex E1 component, alpha subunit	pdhA	1.2.4.1	EF1353-EF1356	EF1353	4	1326892	3	LysR	aaaaatgaagaaattagagttttt	1326742		up
EF1354	[C] pyruvate dehydrogenase complex, E1 component, beta subunit	pdhB	1.2.4.1	EF1353-EF1356	EF1353	4	1326892	3	LysR	aaaaatgaagaaattagagttttt	1326742		up
EF1355	[C] dihydrolipoamide acetyltransferase	aceF	2.3.1.12	EF1353-EF1356	EF1353	4	1326892	3	LysR	aaaaatgaagaaattagagttttt	1326742		up
EF1356	[C] dihydrolipoamide dehydrogenase	lpdA	1.8.1.4	EF1353-EF1356	EF1353	4	1326892	3	LysR	aaaaatgaagaaattagagttttt	1326742		up
EF1358	[C] glycerol dehydrogenase			EF1358-EF1361	EF1358	4	1333423	3	LysR	aaaaatcataatattt	1333288		up
EF1359	[S] hypothetical protein			EF1358-EF1361	EF1358	4	1333423	3	LysR	aaaaatcataatattt	1333288		up
EF1360	[G] dihydroxyacetone kinase family protein			EF1358-EF1361	EF1358	4	1333423	3	LysR	aaaaatcataatattt	1333288		up
EF1361	[G] dihydroxyacetone kinase family protein			EF1358-EF1361	EF1358	4	1333423	3	LysR	aaaaatcataatattt	1333288		up
EF2159	NoCOG	glnA	6.3.1.2	EF2159-EF2160	EF2160	2	2068438	1	LysR	gaacttatgtta	2068496	down	up
EF2159	NoCOG	glnA	6.3.1.2	EF2159-EF2160	EF2160	2	2068438	1	LysR	aaaaaatagaaatgatttgttttt	2068587	down	up
EF2160	[K] regulatory protein GlnR	glnR		EF2159-EF2160	EF2160	2	2068438	1	LysR	gaacttatgtta	2068496	down	up
EF2160	[K] regulatory protein GlnR	glnR		EF2159-EF2160	EF2160	2	2068438	1	LysR	aaaaaatagaaatgatttgttttt	2068587	down	up
EF2364	[F] xanthine permease			EF2364-EF2365	EF2365	2	2288174	3	LysR	aaataaaacaaagtgctatttata	2288254	down	up
EF2365	[F] xanthine phosphoribosyltransferase	xpt	2.4.2.-	EF2364-EF2365	EF2365	2	2288174	3	LysR	aaataaaacaaagtgctatttata	2288254	down	up
EF2430	[F] xanthine/uracil permease family protein			EF2430-EF2431	EF2431	2	2351306	3	LysR	aatgtgatttttttaaaa	2351369	down	up
EF2430	[F] xanthine/uracil permease family protein			EF2430-EF2431	EF2431	2	2351306	3	LysR	taactataaaaatgtgatttttt	2351359	down	up
EF2431	[FR] chlorohydrolase family protein			EF2430-EF2431	EF2431	2	2351306	3	LysR	aatgtgatttttttaaaa	2351369	down	up
EF2431	[FR] chlorohydrolase family protein			EF2430-EF2431	EF2431	2	2351306	3	LysR	taactataaaaatgtgatttttt	2351359	down	up
EF2703	[K] transcriptional regulator			EF2703	EF2703	1	2617295	1	LysR	aaaagcctctcttttttgttattt	2617458		up
EF2711	NoCOG			EF2711	EF2711	1	2626291	5	LysR	aaaaataaaaaatgttgcctattt	2626209		up
EF3198	[P] lipoprotein, YaeC family			EF3198-EF3200	EF3200	3	3072809	2	LysR	aaaaaaaagcaacctttttatttg	3072983		up
EF3199	[P] ABC transporter, permease protein			EF3198-EF3200	EF3200	3	3072809	2	LysR	aaaaaaaagcaacctttttatttg	3072983		up
EF3200	[P] ABC transporter, ATP-binding protein			EF3198-EF3200	EF3200	3	3072809	2	LysR	aaaaaaaagcaacctttttatttg	3072983		up
EF3287	NoCOG			EF3287	EF3287	1	3170486	5	LysR	aaaatatggaaaagagatttttta	3170665		down
EF3303	[S] hypothetical protein			EF3303	EF3303	1	3186091	5	LysR	tgtctaatttttaagca	3186197		up
EF3303	[S] hypothetical protein			EF3303	EF3303	1	3186091	5	LysR	acaaataaagaaaattgtctaatt	3186182		up
EF3317	[C] oxaloacetate decarboxylase			EF3317-EF3326	EF3326	10	3211681	3	LysR	tattaatattatattaagttatta	3211842		down
EF3318	[HI]	citX		EF3317-EF3326	EF3326	10	3211681	3	LysR	tattaatattatattaagttatta	3211842		down
EF3319	[C] citrate lyase, alpha subunit	citF	4.1.3.6	EF3317-EF3326	EF3326	10	3211681	3	LysR	tattaatattatattaagttatta	3211842		down
EF3320	[G] citrate lyase, beta subunit	citE	4.1.3.6	EF3317-EF3326	EF3326	10	3211681	3	LysR	tattaatattatattaagttatta	3211842		down
EF3321	[C] citrate lyase, gamma subunit	citD	4.1.3.6	EF3317-EF3326	EF3326	10	3211681	3	LysR	tattaatattatattaagttatta	3211842		down
EF3322	[C] citrate lyase ligase	citC	6.2.1.22	EF3317-EF3326	EF3326	10	3211681	3	LysR	tattaatattatattaagttatta	3211842		down
EF3323	NoCOG			EF3317-EF3326	EF3326	10	3211681	3	LysR	tattaatattatattaagttatta	3211842		down
EF3324	NoCOG			EF3317-EF3326	EF3326	10	3211681	3	LysR	tattaatattatattaagttatta	3211842		down
EF3325	[I] acetyl-CoA carboxylase			EF3317-EF3326	EF3326	10	3211681	3	LysR	tattaatattatattaagttatta	3211842		down
EF3326	NoCOG			EF3317-EF3326	EF3326	10	3211681	3	LysR	tattaatattatattaagttatta	3211842		down
EF0392	NoCOG			EF0392	EF0392	1	363117	5	GalR-S	tgaaaccgatacc	362993		up
EF2126	NoCOG			EF2126-EF2134	EF2134	9	2042928	5	FruR	ctgaagcaattctgt	2043030		down
EF2127	NoCOG			EF2126-EF2134	EF2134	9	2042928	5	FruR	ctgaagcaattctgt	2043030		down
EF2128	[L] hypothetical protein			EF2126-EF2134	EF2134	9	2042928	5	FruR	ctgaagcaattctgt	2043030		down
EF2129	[L] DNA replication protein, putative			EF2126-EF2134	EF2134	9	2042928	5	FruR	ctgaagcaattctgt	2043030		down
EF2130	[L] DnaD domain protein			EF2126-EF2134	EF2134	9	2042928	5	FruR	ctgaagcaattctgt	2043030		down
EF2131	NoCOG			EF2126-EF2134	EF2134	9	2042928	5	FruR	ctgaagcaattctgt	2043030		down
EF2132	NoCOG			EF2126-EF2134	EF2134	9	2042928	5	FruR	ctgaagcaattctgt	2043030		down
EF2133	NoCOG			EF2126-EF2134	EF2134	9	2042928	5	FruR	ctgaagcaattctgt	2043030		down
EF2134	NoCOG			EF2126-EF2134	EF2134	9	2042928	5	FruR	ctgaagcaattctgt	2043030		down
EF0100	[J] seryl-tRNA synthetase	serS-1	6.1.1.11	EF0100	EF0100	1	103833	3	Fis	tgtttaaaatttaatca	103800		down
EF3303	[S] hypothetical protein			EF3303	EF3303	1	3186091	5	Fis	tgtctaatttttaagca	3186197		up
EF3303	[S] hypothetical protein			EF3303	EF3303	1	3186091	5	Fis	acaaataaagaaaattgtctaatt	3186182		up
EF3027	[O] serine protease DO	htrA	3.4.21.-	EF3027	EF3027	1	2907334	4	DnaA	ttatccac	2907116	up	up
EF0900	[C] aldehyde-alcohol dehydrogenase	adhE		EF0900	EF0900	1	864152	3	CRP-FNR	atgtgaaatagttaacaa	864048	up	down
EF0900	[C] aldehyde-alcohol dehydrogenase	adhE		EF0900	EF0900	1	864152	3	CRP-FNR	atgtgaaatagttaacaa	864048	up	down
EF0900	[C] aldehyde-alcohol dehydrogenase	adhE		EF0900	EF0900	1	864152	3	CRP-FNR	atgtgaaatagttaacaa	864048	up	down
EF0900	[C] aldehyde-alcohol dehydrogenase	adhE		EF0900	EF0900	1	864152	3	CRP-FNR	atgtgaaatagttaacaa	864048	up	down
EF2430	[F] xanthine/uracil permease family protein			EF2430-EF2431	EF2431	2	2351306	3	CRP-FNR	aatgtgatttttttaaaa	2351369	down	up
EF2430	[F] xanthine/uracil permease family protein			EF2430-EF2431	EF2431	2	2351306	3	CRP-FNR	taactataaaaatgtgatttttt	2351359	down	up
EF2431	[FR] chlorohydrolase family protein			EF2430-EF2431	EF2431	2	2351306	3	CRP-FNR	aatgtgatttttttaaaa	2351369	down	up
EF2431	[FR] chlorohydrolase family protein			EF2430-EF2431	EF2431	2	2351306	3	CRP-FNR	taactataaaaatgtgatttttt	2351359	down	up
EF3173	NoCOG			EF3173	EF3173	1	3047067	5	CRP-FNR	ttaattattacgaaaa	3046991	down	down
EF3173	NoCOG			EF3173	EF3173	1	3047067	5	CRP-FNR	aaaatgttcattttctcaca	3047006	down	down
EF3256	[S] pheromone cAD1 precursor lipoprotein			EF3256	EF3256	1	3134839	5	CRP-FNR	tgtgatacattacacatt	3134885		down
EF0132	NoCOG			EF0132-EF0133	EF0132	2	135317	5	ArgR	gtataaaaattaa	135285		down
EF0133	NoCOG			EF0132-EF0133	EF0132	2	135317	5	ArgR	gtataaaaattaa	135285		down
EF0758	[P] cadmium-translocating P-type ATPase			EF0758-EF0759	EF0758	2	713595	2	ArgR	gaatatatattca	713545	down	up
EF0759	[S] sapB protein, putative			EF0758-EF0759	EF0758	2	713595	2	ArgR	gaatatatattca	713545	down	up
EF0778	NoCOG			EF0778-EF0780	EF0778	3	735904	5	ArgR	tgaatttgttttcatt	735868	down	up
EF0779	[C] glycerophosphoryl diester phosphodiesterase family protein			EF0778-EF0780	EF0778	3	735904	5	ArgR	tgaatttgttttcatt	735868	down	up
EF0780	[LR] MutT/nudix family protein			EF0778-EF0780	EF0778	3	735904	5	ArgR	tgaatttgttttcatt	735868	down	up
EF0797	NoCOG			EF0797-EF0798	EF0798	2	758659	5	ArgR	tgcttttaaataaatt	758612	up	up
EF0798	[S] hypothetical protein			EF0797-EF0798	EF0798	2	758659	5	ArgR	tgcttttaaataaatt	758612	up	up
EF0891	[E] aspartate aminotransferase			EF0891-EF0893	EF0893	3	860186	3	ArgR	gtataaaaattta	860243	up	down
EF0892	[E] amino acid ABC transporter, ATP-binding protein			EF0891-EF0893	EF0893	3	860186	3	ArgR	gtataaaaattta	860243	up	down
EF0893	[E] amino acid ABC transporter, amino acid-binding/permease protein			EF0891-EF0893	EF0893	3	860186	3	ArgR	gtataaaaattta	860243	up	down
EF0907	[E] peptide ABC transporter, peptide-binding protein			EF0907	EF0907	1	873037	3	ArgR	aaataattattaa	872974		down
EF0907	[E] peptide ABC transporter, peptide-binding protein			EF0907	EF0907	1	873037	3	ArgR	aaaaattaaaaaaagttaacattt	872902		down
EF0987	NoCOG			EF0987	EF0987	1	944622	5	ArgR	aaataattaatca	944355		up
EF1057	[P] Mn2+/Fe2+ transporter, NRAMP family			EF1057-EF1058	EF1057	2	1028878	2	ArgR	tgattgaatatgcaaa	1028921	down	up
EF1058	[T] universal stress protein family			EF1057-EF1058	EF1057	2	1028878	2	ArgR	tgattgaatatgcaaa	1028921	down	up
EF1262	[R] hypothetical protein			EF1262-EF1263	EF1263	2	1230248	5	ArgR	atgaattaattatgaa	1230292	up	up
EF1263	NoCOG			EF1262-EF1263	EF1263	2	1230248	5	ArgR	atgaattaattatgaa	1230292	up	up
EF2484	[R] hypothetical protein			EF2484	EF2484	1	2405616	5	ArgR	ttattatttaagtata	2405674		down
EF3173	NoCOG			EF3173	EF3173	1	3047067	5	ArgR	ttaattattacgaaaa	3046991	down	down
EF3173	NoCOG			EF3173	EF3173	1	3047067	5	ArgR	aaaatgttcattttctcaca	3047006	down	down
* Enterococcus faecalis V583 strain (NCBI genome code NC_004668.1)
1. COG Operon significance		number
Replication, transcription, translation		1
Transport and signaling		2
Basal metabolism and energy production		3
Other functions		4
Hypothetical proteins		5
