# Supplementary material for: Interplay between copper and zinc homeostasis through the transcriptional regulator Zur in Enterococcus faecalis
Source: Royal Society of Chemistry journal article supplement (doi:10.1039/c5mt00043b), 2015-04-09
Supplement: c5mt00043b5.xlsx [file c5mt00043b5.xlsx]

## Sheet: S3
Supplementary table 3
Gene-specific primers used in qPCR and Δzur mutant construction.
qPCR assays
Id codea	Gene namea	Anotationa	Forward primer (5’ → 3’)	Reverse primer (5’ → 3’)
EF0758	zn atpase	translocating P-type ATPase	GGGGAAGGCTTTGGAGATAC	TCACGTTGACTTTTGCCTTG
EF1400	zntA	translocating P-type ATPase	ATAAAAATGGGGCCTTGACC	TGGTGGAATCACTGCCAATA
EF0859	fief	cation efflux family protein	AAGCCAGCGGATAAAGAACA	GTAAAACAGCCCTTGCCAAA
EF0055	adcA	ABC transporter operon	AAAATCGGACCTTTGTGACG	GCTAATTCGACGCCTGTCTC
EF0056	adcB	ABC transporter operon	TTCCCAGAAATCGTTGGTTC	GTCGCAAACACTCGTGCTAA
EF0057	adcC	ABC transporter operon	TTGGCTTTGGCGTTAGTTTT	TAGCCCATCAACATGAGCAG
EF3206	adcA-II	adhesion lipoprotein	ATCCATGATGCGGATGTTTT	GATGAGGCGAAACCCAAGTA
EF2417	zur	transcriptional regulator, Fur family	CACAACGACCAAGGATTTCA	GTTGCCAAGAGGTGGAACAT
Δzur mutant
Primer location (name)		Forward primer (5’ → 3’)	Reverse primer (5’ → 3’)
zur_up		GCTCTAGAgagaagcgacatcaataacga	CGGGATCCtccctcaccaacctaaatca
zur_down		CGGGATCCtggttgacggttatttatgct	GGAATTCgaaaaccgtaaaaagctaccg
a E. faecalis V583 genome information (Paulsen 2003)
Introduced restriction sites are underlined. Restriction Sites: XbaI: 5’…TCTAGA…3’; BamHI: 5’…GGATCC…3’; EcoRI: 5’…GAATTC…
